# Supplementary material for: The Curcumin Derivative GT863 Protects Cell Membranes in Cytotoxicity by Aβ Oligomers
Source: MDPI journal article supplement (doi:10.3390/ijms24043089), 2023-02-04
Supplement: s1 [file s1]

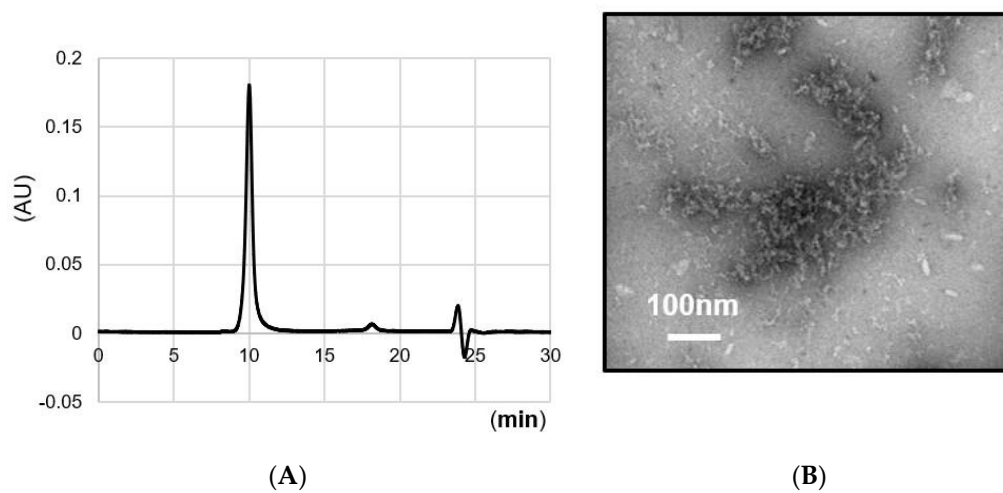

**Figure S1.** Preparation of HMW A $\beta$ o. **(A)** SEC of A $\beta$ <sub>1-42</sub>. The synthesized A $\beta$ <sub>1-42</sub> was applied on a gel filtration column. The peak for the HMW A $\beta$ o is 10.02 min, with a high proportion of HMW A $\beta$ o in the total. **(B)** TEM image of HMW A $\beta$ o including protofibrils. The scale bars represent 100 nm.
